# Supplementary material for: Tizoxanide Antiviral Activity on Dengue Virus Replication
Source: MDPI journal article supplement (doi:10.3390/v15030696), 2023-03-07
Supplement: s1 [file s1]

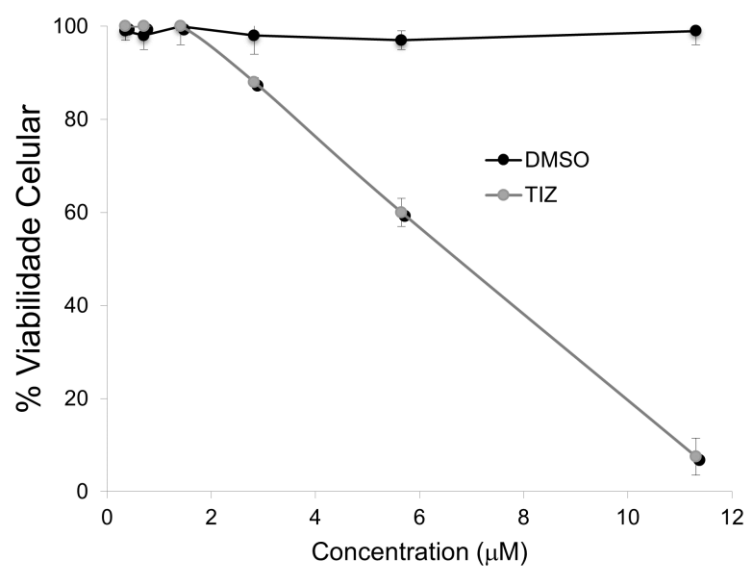

**Figure S1.** Viability of TIZ-treated Vero cells (72-h treatment) by neutral red dye uptake method. Data are presented as mean % cell viability of six replicates, compared to non-treated cell controls  $\pm$  SD. The SD bars are obscured by the dot.
