# Supplementary material for: Tizoxanide Antiviral Activity on Dengue Virus Replication
Source: MDPI journal article supplement (doi:10.3390/v15030696), 2023-03-07
Supplement: s1 [file s1]

Table S2: Viral adsorption inhibition assay

| [ ] $\mu\text{M}$ | PFU | PFU | PFU | Average | Standard deviation | % VI |
|-------------------|-----|-----|-----|---------|--------------------|------|
| 0.0               | 253 | 255 | 258 | 255     | 2.05               |      |
| 1.0               | 254 | 252 | 257 | 254     | 2.05               | 0.4  |
| 1.4               | 256 | 252 | 250 | 253     | 2.49               | 1.0  |
| 1.8               | 260 | 255 | 256 | 257     | 2.16               | -0.7 |
| 2.2               | 255 | 251 | 254 | 253     | 1.70               | 0.8  |
