# Supplementary material for: Tizoxanide Antiviral Activity on Dengue Virus Replication
Source: MDPI journal article supplement (doi:10.3390/v15030696), 2023-03-07
Supplement: s1 [file s1]

Table S3: Virus penetration inhibition assay

| [ ] $\mu\text{M}$ | PFU | PFU | PFU | Average | Standard deviation | % VI |
|-------------------|-----|-----|-----|---------|--------------------|------|
| 0.0               | 250 | 240 | 247 | 246     | 4.19               |      |
| 1.0               | 250 | 255 | 249 | 251     | 2.62               | -2.3 |
| 1.4               | 240 | 247 | 251 | 246     | 4.55               | -0.1 |
| 1.8               | 245 | 252 | 250 | 249     | 2.94               | -1.4 |
| 2.2               | 240 | 248 | 245 | 244     | 3.30               | 0.5  |
