# Supplementary material for: Tizoxanide Antiviral Activity on Dengue Virus Replication
Source: MDPI journal article supplement (doi:10.3390/v15030696), 2023-03-07
Supplement: s1 [file s1]

Table S1: Pre-treatment test

|             | [ ] $\mu\text{M}$ | PFU | PFU | PFU | Average | Standard deviation | % VI        |
|-------------|-------------------|-----|-----|-----|---------|--------------------|-------------|
| <b>1 h</b>  | <b>0</b>          | 285 | 288 | 284 | 286     | 1.70               |             |
|             | <b>0.30</b>       | 287 | 286 | 285 | 286     | 0.82               | <b>-0.1</b> |
|             | <b>0.40</b>       | 286 | 284 | 283 | 284     | 1.25               | <b>0.5</b>  |
|             | <b>0.50</b>       | 280 | 282 | 282 | 281     | 0.94               | <b>1.5</b>  |
|             | <b>0.60</b>       | 283 | 284 | 282 | 283     | 0.82               | <b>0.9</b>  |
| <b>12 h</b> | <b>0</b>          | 280 | 285 | 282 | 282     | 2.05               |             |
|             | <b>0.1</b>        | 278 | 275 | 277 | 277     | 1.25               | <b>2.0</b>  |
|             | <b>1.4</b>        | 279 | 274 | 277 | 277     | 2.05               | <b>2.0</b>  |
|             | <b>1.8</b>        | 282 | 280 | 278 | 280     | 1.63               | <b>0.8</b>  |
|             | <b>2.2</b>        | 275 | 270 | 277 | 274     | 2.94               | <b>3.0</b>  |
| <b>24 h</b> | <b>0</b>          | 282 | 280 | 285 | 282     | 2.05               |             |
|             | <b>0.30</b>       | 280 | 283 | 286 | 283     | 2.45               | <b>-0.2</b> |
|             | <b>0.40</b>       | 284 | 280 | 283 | 282     | 1.70               | <b>0.0</b>  |
|             | <b>0.50</b>       | 281 | 277 | 284 | 281     | 2.87               | <b>0.6</b>  |
|             | <b>0.60</b>       | 280 | 277 | 275 | 277     | 2.05               | <b>1.8</b>  |
