# Supplementary material for: Tizoxanide Antiviral Activity on Dengue Virus Replication
Source: Viruses. 2023 Mar 7;15(3):696. doi: 10.3390/v15030696 (PMC10055917; doi:10.3390/v15030696)
Supplement: Supplementary file 1 [file viruses-15-00696-s001.zip]

Archive with 4 entries (4 files):
- Additional file 1 S1.pdf
- Additional file 1 S2.pdf
- Additional file 1 S3.pdf
- Figure S1 new.pdf
